# Supplementary material for: Concurrent analysis of genome and transcriptome in one single cell
Source: PubMed Central journal article supplement — BMC Res Notes. 2024 Sep 16;17:267. doi: 10.1186/s13104-024-06927-0 (PMC11403997; doi:10.1186/s13104-024-06927-0), 2024-09-16
Supplement: 13104_2024_6927_MOESM1_ESM.pdf [file 13104_2024_6927_MOESM1_ESM.pdf]

## Title: Concurrent analysis of genome and transcriptome in one single cell

Johanna Heid<sup>1\*</sup>, Ronald Cutler<sup>1</sup>, Moonsook Lee<sup>1</sup>, Jan Vijg<sup>1, 2</sup> and Alexander Y. Maslov<sup>1, 3\*</sup>

### Supplementary tables and figures

Table 1: LDO results of separated and non-separated single cells.  $\Delta\Delta CT$  values greater than 0.2 mark the passing of the particular genomic loci (highlighted in green).

|          | sep_1    | sep_2    | sep_3    | non-sep1 | non-sep2 | non-sep3 |
|----------|----------|----------|----------|----------|----------|----------|
| target 1 | 1.562419 | 1.16816  | 0.757456 | 0.20583  | 0.462665 | 0.516902 |
| target 2 | 0.378329 | 0.924101 | 0.385863 | 0.309555 | 0.255154 | 0.138418 |
| target 3 | 1.040357 | 0.244198 | 0.002706 | 0.463318 | 0.129319 | 0.959483 |
| target 4 | 0.073058 | 2.03288  | 0.715105 | 0.515424 | 0.310383 | 0.23392  |
| target 5 | 1.015064 | 0.16847  | 0.328062 | 0.629856 | 3.384569 | 0.695215 |
| target 6 | 0.69544  | 4.320695 | 0.187688 | 0.512731 | 1.674983 | 0.411174 |
| target 7 | 1.462495 | 0.36903  | 0.308607 | 0.828195 | 0.915885 | 0.453706 |
| target 8 | 1.792035 | 0.791462 | 2.27111  | 0.239909 | 0.466191 | 0.295373 |

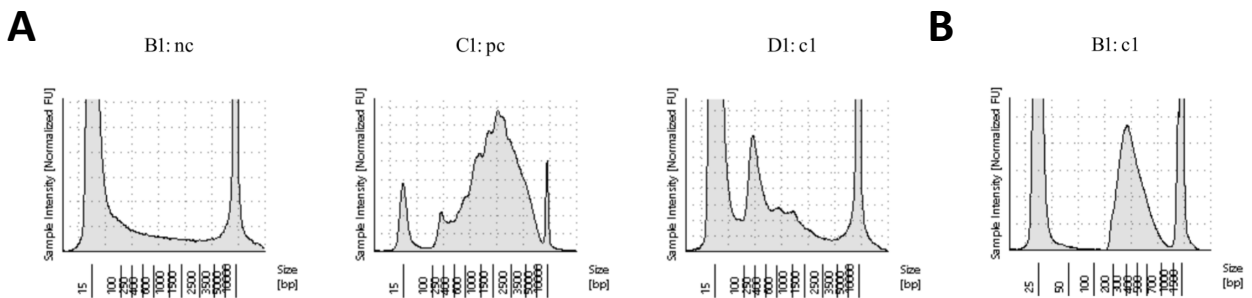

Supplementary Figure 1: Samples were run on a Tape Station device for quality control purposes. A) cDNA from separated samples. C1 represents sample selected for library preparation. B1 negative control and C1 positive control (1ng RNA as input). B) Final library of separated samples after amplification.

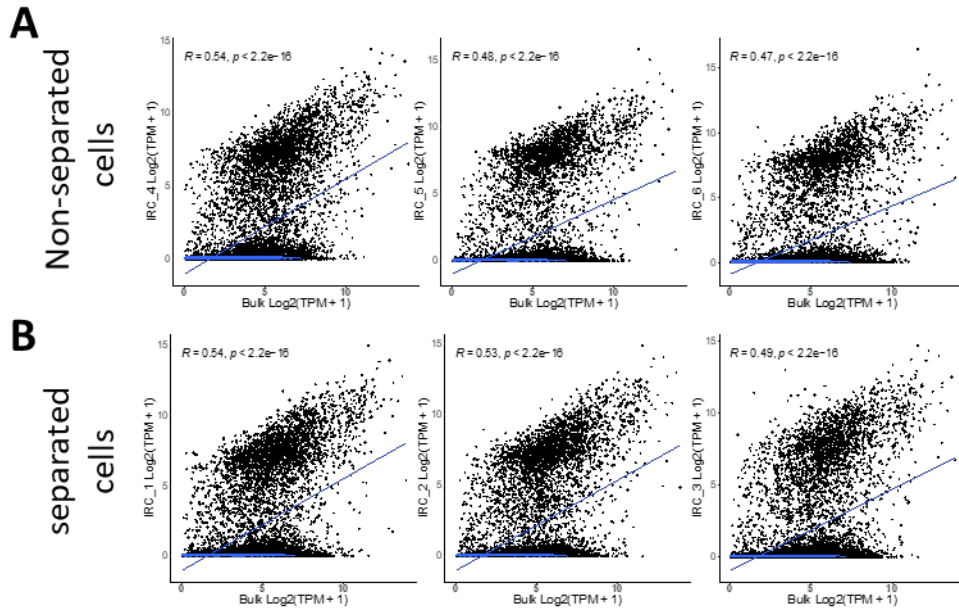

Supplementary Figure 2: Single cell gene expression correlates with mRNA expression of bulk. A) Overlapping genes in pseudo bulk consisting of three non-separated single cells and bulk. D) Overlapping genes of pseudo bulk from three separated single cells and bulk.

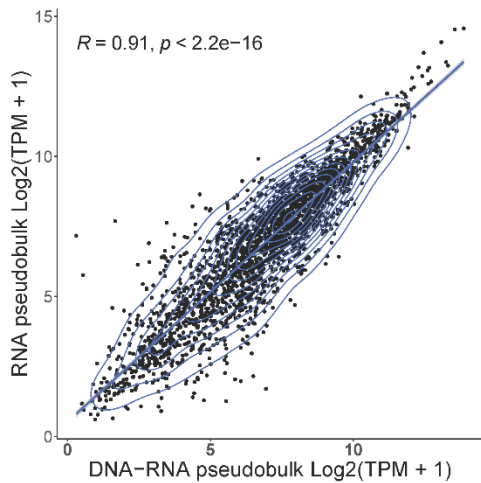

Supplementary Figure 3: The pseudo bulks from mRNA of separated and non-separated cells correlate well.

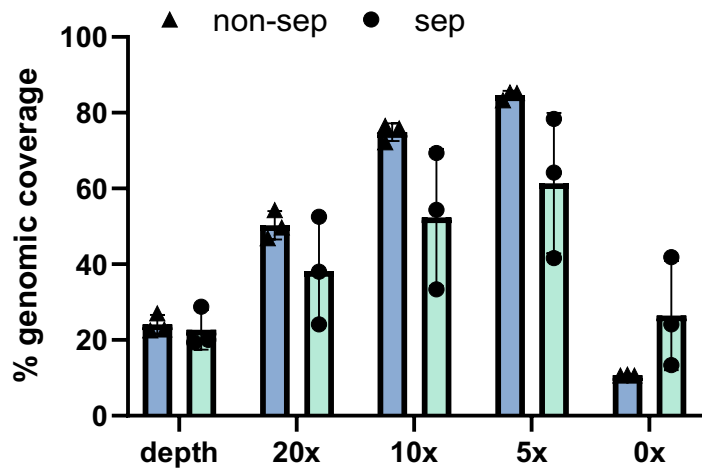

Supplementary Figure 4: Genomic coverage across single cells.
